# Supplementary material
Source: PubMed Central journal article supplement (PMC7563675)
Supplement: jamaotolaryngolheadnecksurg-e203382-s001.pdf [file jamaotolaryngolheadnecksurg-e203382-s001.pdf]

## Supplementary Online Content

Sahovaler A, Kim MH, Mendez A, et al. Survival outcomes in human papillomavirus–associated nonoropharyngeal squamous cell carcinomas: a systematic review and meta-analysis. *JAMA Otolaryngol Head Neck Surg*. Published online October 15, 2020. doi:10.1001/jamaoto.2020.3382

**eMethods.** Search Strategy

**eFigure 1.** Study Inclusion Flow Diagram

**eFigure 2.** Funnel Plots of Each Subsite

**eTable.** Newcastle-Ottawa Scale for Assessing the Quality of Nonrandomized Studies

This supplementary material has been provided by the authors to give readers additional information about their work.

## eMethods. Search Strategy

Search History saved as "2018.05. SR\_Human papillomavirus 16 non-oropharyngealcancers\_surv\_M\_FNL"

Topic: Survival of non-oropharyngeal cancers that express a marker Human papillomavirus 16/ P16

Dr Axel Sahovaler;

Dr Danielle MacNeil

**Database: Ovid MEDLINE(R) ALL** <1946 to December, 2019>

Search Strategy:

- 
- 1 (nonoropharynx\$ or non-oropharynx\$ or (non-OP or non-OPC or non-OP SCC\$ or non-OPSCC\$)).mp. (240)
  - 2 laryngeal neoplasms/ or exp Mouth Neoplasms/ or pharyngeal neoplasms/ or hypopharyngeal neoplasms/ (98774)
  - 3 ((cancer\$ or carcinoma\$ or neoplas\$ or metast\$ or tumor\$ or malignan\$ or SCC or cSCC or squamous\$) adj10 (tongue\$ or lip or lips or gingival\$ or gum or gums or ((salivary\$ or sub-lingual\$ or sublingual\$ or submandibular\$ or sub-mandibular\$) adj2 gland\$) or parotid\$ or oral or (oral\$ adj2 cavit\$) or mouth\$ or laryngeal\$ or larynx\$ or supraglottis\$ or supra-glottis\$ or hypopharynx\$ or hypopharynx\$ or pharynx\$)).tw,kw. (104213)
  - 4 or/1-3 (143823)
  - 5 (head and neck).ti. and (carcinoma\$ and (epidermoid\$ or planocellular\$ or squamous\$)).tw. (13755)
  - 6 Human papillomavirus 16/ or (hvp-16 or hvp16 or (hvp\$ adj2 "16") or (human\$ adj3 (papillomavirus\$ or papillomavirus\$) adj3 "16")).tw,kw. (15847)
  - 7 Cyclin-Dependent Kinase Inhibitor p16/ or (p16 or (protein\$ adj2 "16") or p-16).tw,kw. or (interferon-inducible and (IFI-16 or IFI16)).mp. (22214)
  - 8 exp Papillomavirus Infections/ or (papilloma-virus\$ or papillomavirus\$).tw,kw. (56389)
  - 9 and/7-8 (2901)
  - 10 6 or 9 (17462)
  - 11 exp \*Papillomavirus Infections/ or (hvp or (human\$ adj3 (papilloma-virus\$ or papillomavirus\$))).ti. or (hvp or (human\$ adj3 (papilloma-virus\$ or papillomavirus\$))).ab. /freq=3 (47503)

- 12 10 or 11 (49692)
- 13 (4 and 12) or (5 and 10) (3413)
- 14 exp Survivors/ or Survival Analysis/ or surviv\$.mp. or Prevalence/ or prevalence\$.mp. or prevalent\$.mp. (2177302)
- 15 exp Prognosis/ or prognos\$.tw. or exp Recurrence/ or (relapse\$ or recrudescence\$ or recurr\$ or re-curr\$).mp. or NEOPLASM RECURRENCE, LOCAL/ (2424419)
- 16 or/14-15 (4002163)
- 17 13 and 16 (1825)
- 18 limit 17 to english language (1726)
- 19 limit 18 to "all adult (19 plus years)" (995)
- 20 limit 18 to "all child (0 to 18 years)" (216)
- 21 18 not (20 not (19 and 20)) (1667)
- 22 21 not (exp Animals/ not (Human/ and exp Animals/)) (1650)
- 23 (mice or rat or rats or cat\$1 or cattle\$1 or dog\$1 or goat\$1 or horse\$1 or rabbit\$1 or sheep\$1 or swine\$1 or pig\$1 or canine\$1 or feline\$1 or porcine\$ or calf).ti. (1749197)
- 24 22 not 23 (1648)
- 25 case report.ti. (234154)
- 26 24 not 25 (1637)
- 27 limit 26 to "review articles" (256)
- 28 26 not 27 (1381)
- 29 meta analysis.mp,pt. or MEDLINE.tw. or systematic review.tw. (312684)
- 30 26 and 29 (58)
- 31 28 or 30 (1350)**

\*\*\*\*\*

**Database: Embase Classic+Embase** <1947 to 2019 December>

Search Strategy:

- 
- 1 (nonoropharynx\$ or non-oropharynx\$ or (non-OP or non-OPC or non-OP SCC\$ or non-OPSCC\$)).tw,kw. (404)
  - 2 exp \*larynx tumor/ or \*mouth tumor/ or exp \*mouth cancer/ or exp \*pharynx tumor/ or exp \*salivary gland tumor/ or exp \*tongue tumor/ (103718)
  - 3 ((cancer\$ or carcinoma\$ or neoplas\$ or metast\$ or tumo?r\$ or malignan\$ or SCC or cSCC or squamous\$) adj5 (tongue\$ or lip or lips or gingival\$ or gum or gums or ((salivary\$ or sub-lingual\$ or sublingual\$ or submandibular\$ or sub-mandibular\$) adj2 gland\$) or parotid\$ or oral or (oral\$ adj2 cavit\$) or mouth\$ or laryngeal\$ or larynx\$ or supraglotti\$ or supra-glotti\$ or hypopharynx\$ or hypopharynx\$ or pharynx\$)).tw,kw. (116252)
  - 4 or/1-3 (161150)

- 5 (head and neck).ti. and (carcinoma\$ adj3 (epidermoid\$ or planocellular\$ or squamous\$)).tw. (18860)
- 6 Human papillomavirus type 16/ or (hvp-16 or hvp16 or (hvp\$ adj2 "16") or (human\$ adj3 (papilloma-virus\$ or papillomavirus\$) adj3 "16")).tw,kw. (21746)
- 7 protein p16/ec or cyclin dependent kinase inhibitor 2A/ec or (p16 or (protein\$ adj2 "16") or p-16).tw,kw. or (interferon-inducible and (IFI-16 or IFI16)).mp. (34886)
- 8 Wart virus/ or exp papillomavirus infection/ or (papilloma-virus\$ or papillomavirus\$).tw,kw. (79194)
- 9 and/7-8 (4630)
- 10 6 or 9 (24635)
- 11 \*Wart virus/ or exp \*papillomavirus infection/ or (hvp or (human\$ adj3 (papilloma-virus\$ or papillomavirus\$))).ti. or (hvp or (human\$ adj3 (papilloma-virus\$ or papillomavirus\$))).ab. /freq=3 (59638)
- 12 10 or 11 (63511)
- 13 (4 and 12) or (5 and 10) (6099)
- 14 exp survival/ or cancer survivor/ or survival analysis/ or surviv\$.tw,kw. (1920572)
- 15 exp Prognosis/ or prognos\$.tw. or tumor recurrence/ or cancer recurrence/ or recurrent disease/ or (relapse\$ or recrudescence\$ or recurr\$ or re-curr\$).tw,kw. (2173595)
- 16 or/14-15 (3483547)
- 17 13 and 16 (3239)
- 18 limit 17 to english language (3120)
- 19 limit 18 to (adult <18 to 64 years> or aged <65+ years>) (1778)
- 20 limit 18 to (embryo <first trimester> or infant <to one year> or child <unspecified age>) (96)
- 21 18 not (20 not (19 and 20)) (3071)
- 22 21 not ((exp animal/ or nonhuman/) not exp human/) (3025)
- 23 (mice or rat or rats or cat\$1 or cattle\$1 or dog\$1 or goat\$1 or horse\$1 or rabbit\$1 or sheep\$1 or swine\$1 or pig\$1 or canine\$1 or feline\$1 or porcine\$ or calf).ti. (2140128)
- 24 22 not 23 (3022)
- 25 case report.ti. (307659)
- 26 24 not 25 (2916)
- 27 limit 26 to "review" (291)
- 28 26 not 27 (2625)
- 29 meta analysis/ or "systematic review"/ or systematic review.tw. (372441)
- 30 26 and 29 (74)
- 31 28 or 30 (2597)**

eFigure 1. Study inclusion flow diagram.

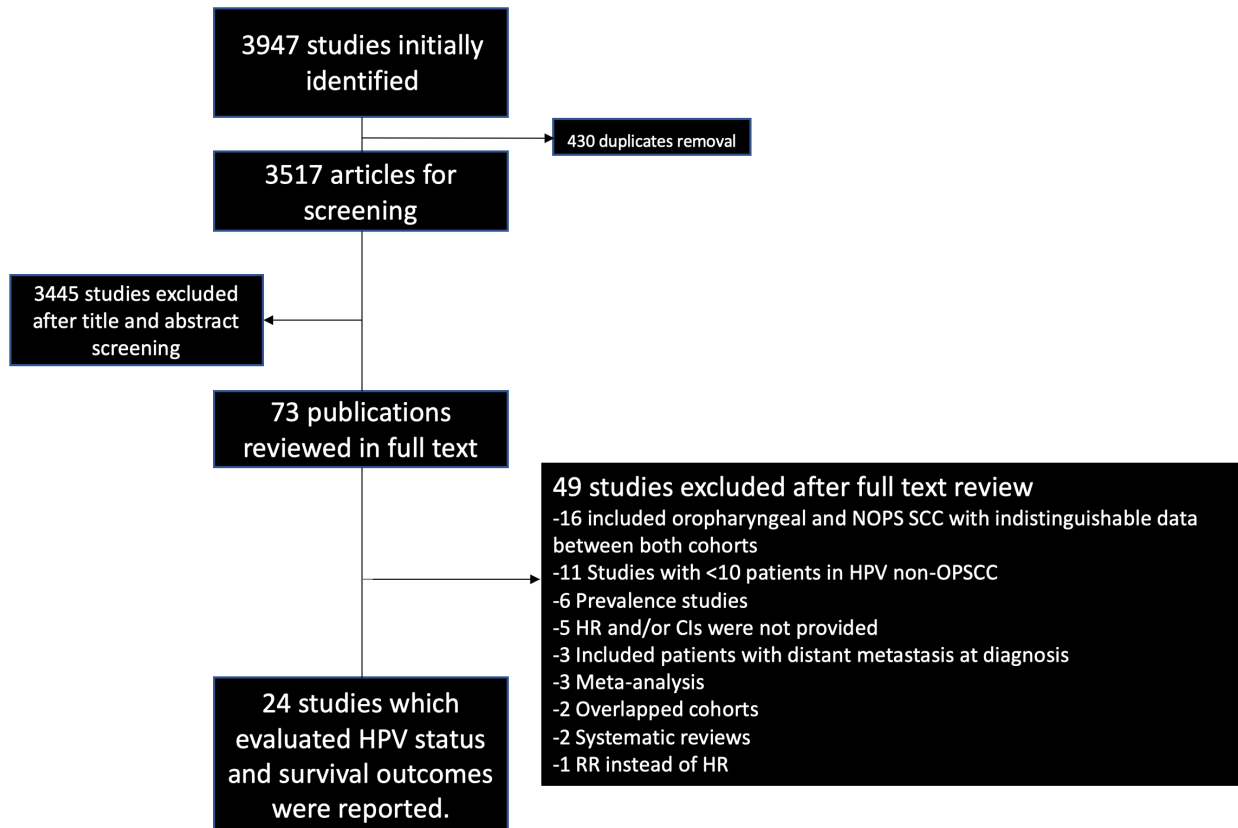

eFigure 2. Funnel plots of each subsite.

Oral Cavity

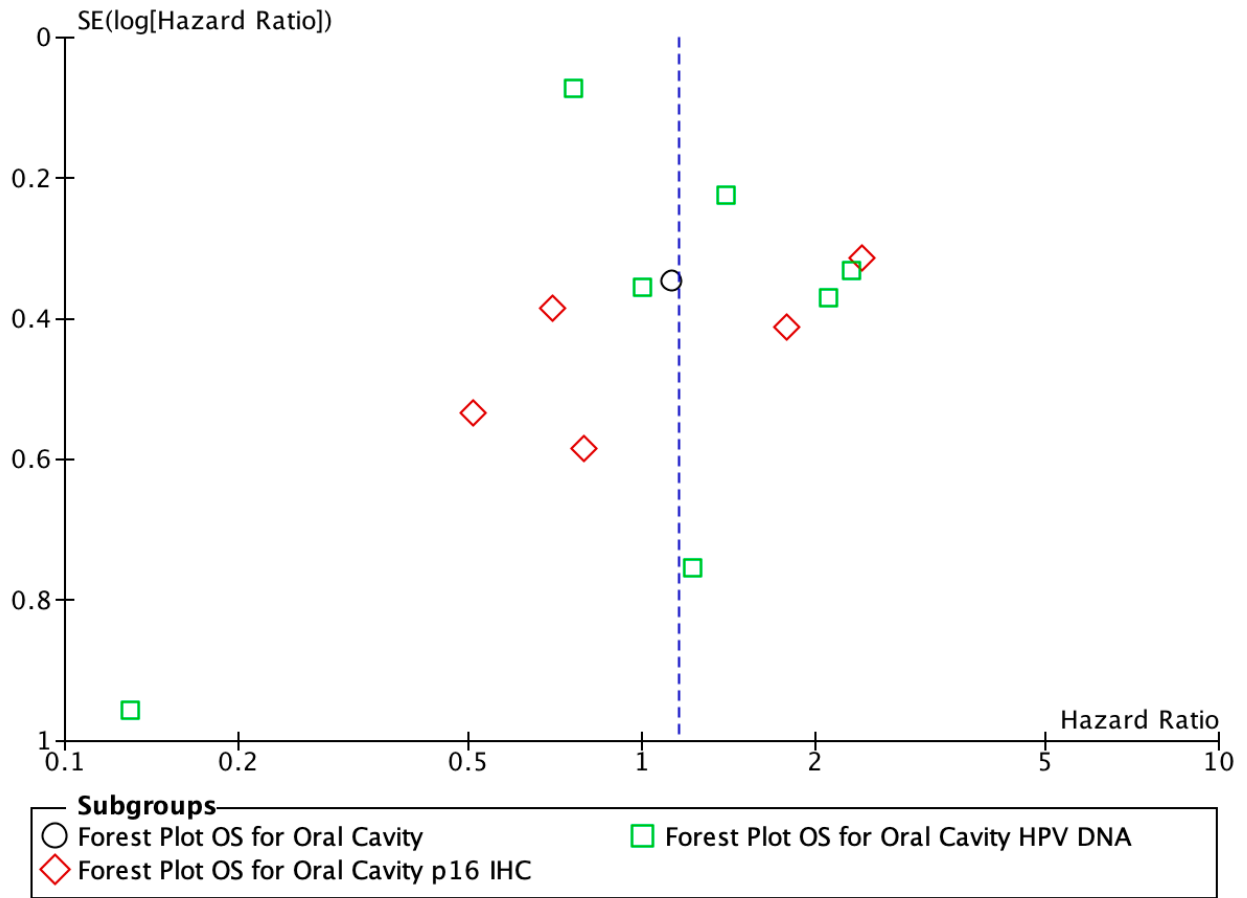

Nasopharynx

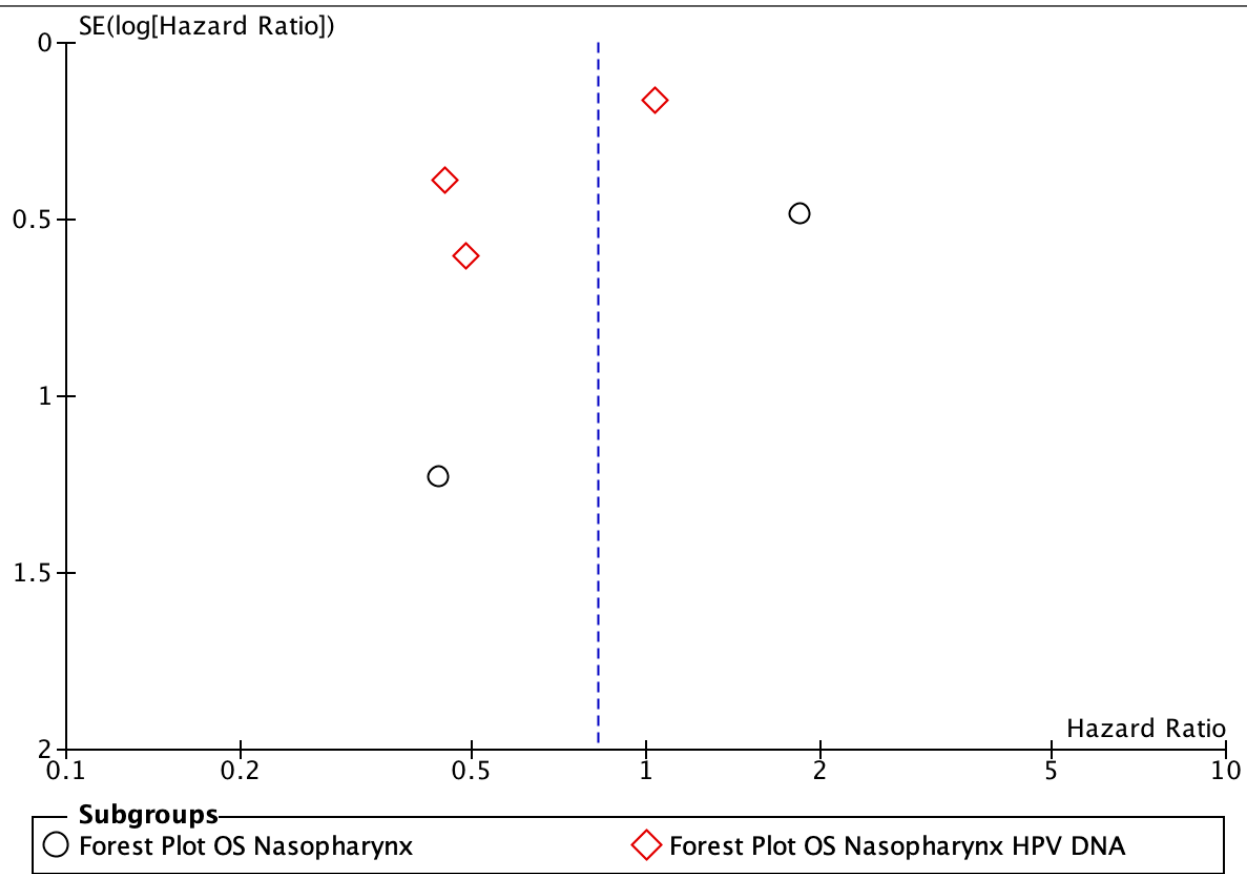

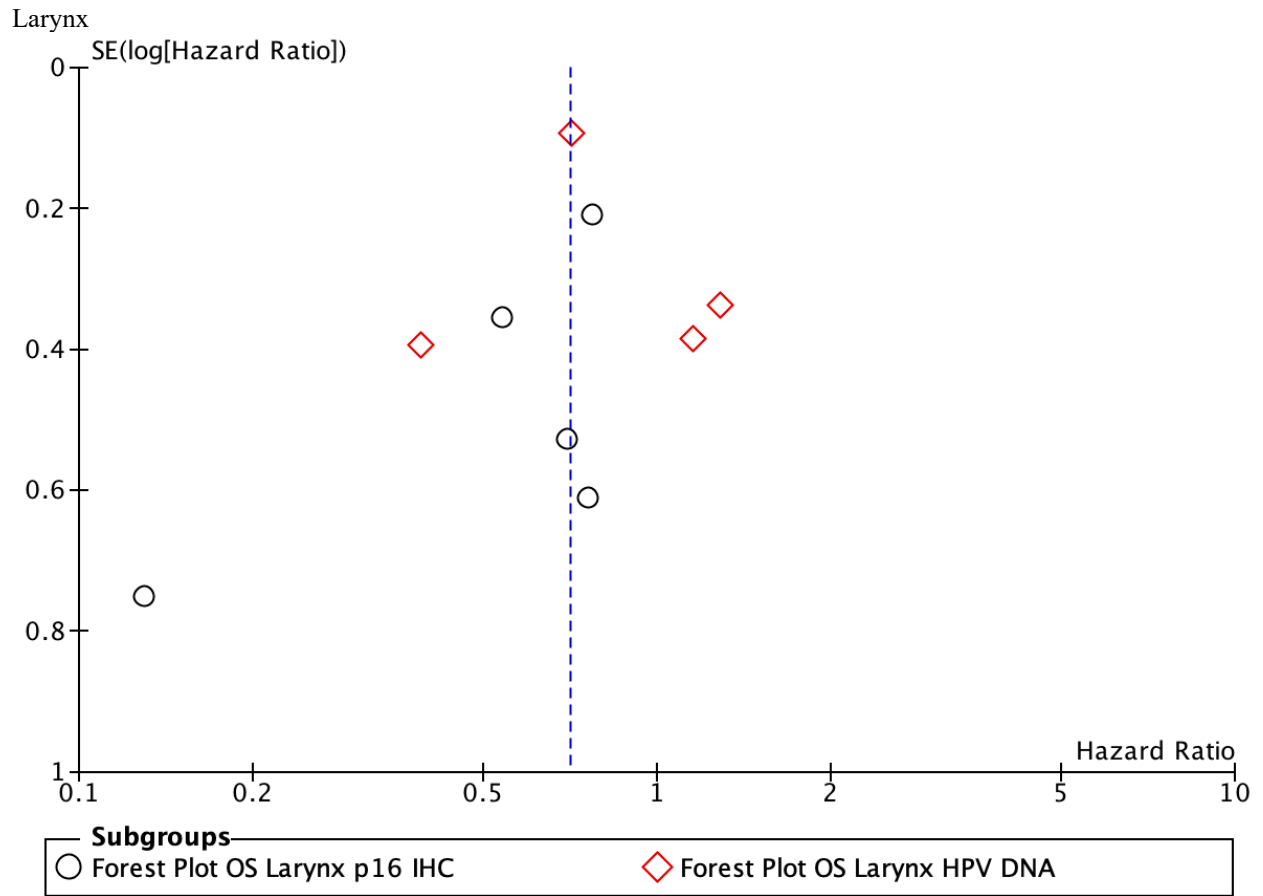



Hypopharynx

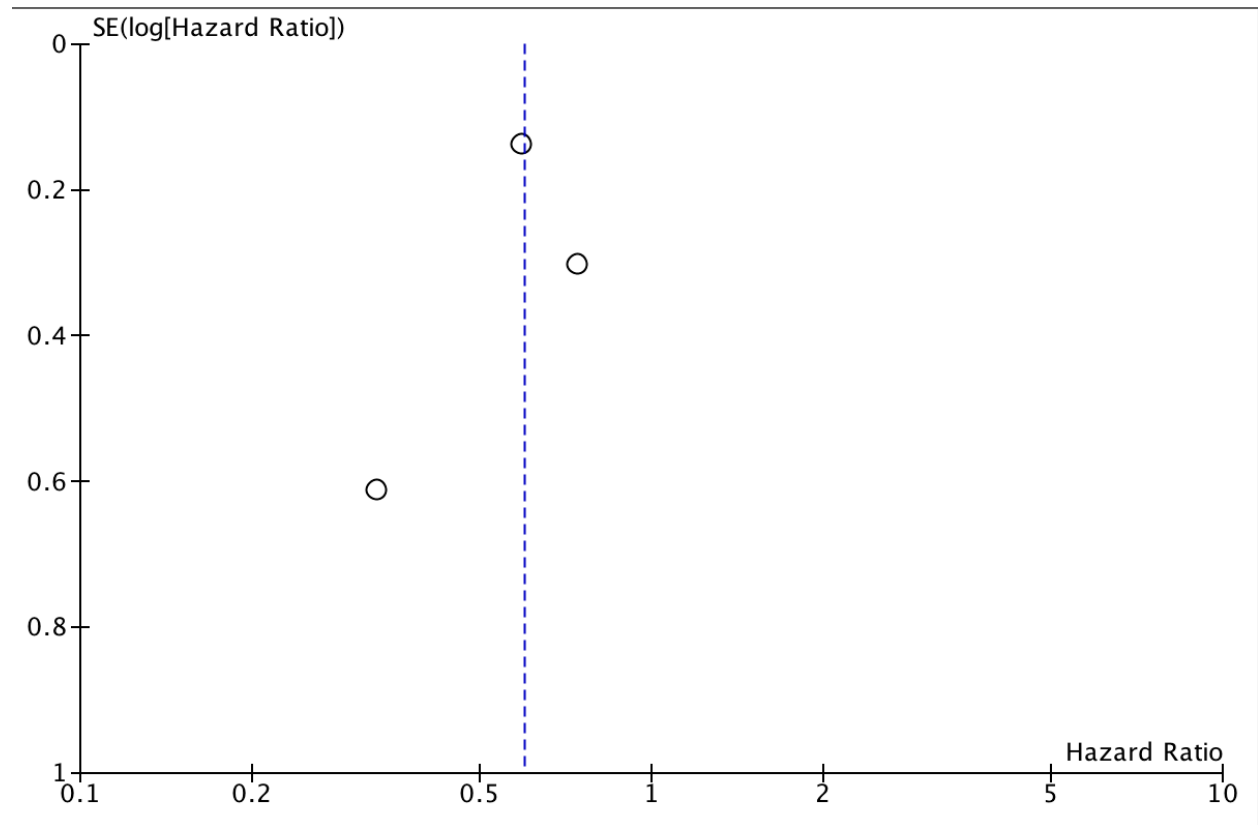

eTable. Newcastle-Ottawa Scale for Assessing the Quality of Nonrandomized Studies

| Study           | Location    | Selection | Comparability | Outcomes |
|-----------------|-------------|-----------|---------------|----------|
| Chuang 2012     | Taiwan      | ****      | **            | ***      |
| Chung 2014      | USA         | ****      | **            | ***      |
| Fakhry 2016     | USA         | ****      | **            | ***      |
| Hernandez 2014  | USA         | ****      | **            | ***      |
| Jiang 2015      | USA         | ****      | *             | **       |
| Kang 2016       | South Korea | ****      | **            | ***      |
| Lai 2017        | Sydney      | ****      | **            | ***      |
| Lam 2018        | China       | ****      | **            | ***      |
| Lassen 2014     | Denmark     | ****      | **            | **       |
| Lee 2012        | Taiwan      | ****      | *             | ***      |
| Lee 2015        | Taiwan      | ****      | *             | ***      |
| Li 2018         | USA         | ****      | *             | ***      |
| Loeschke 2016   | Germany     | ****      | **            | ***      |
| Ni 2019         | China       | ****      | **            | **       |
| Ramshankar 2014 | India       | ****      | **            | ***      |
| Rodriguez 2016  | Spain       | ****      | **            | ***      |
| Ruuskanen 2018  | Finland     | ****      | *             | **       |
| Saghravani 2016 | Iran        | ****      | **            | ***      |
| Stanley 2019    | USA         | ****      | *             | **       |
| Stenmark 2013   | USA         | ****      | *             | ***      |
| Tong 2018       | China       | ****      | **            | ***      |
| Wotman 2019     | USA         | ****      | **            | ***      |
| Young 2015      | Australia   | ****      | **            | ***      |
| Zhao 2009       | China       | ****      | **            | **       |
